## Ultraviolet sensitivity and colour vision in raptor foraging

Olle Lind, Mindaugas Mitkus, Peter Olsson and Almut Kelber

10.1242/jeb.096123

There was an error published in *J. Exp. Biol.* **216**, 1819-1826.

In supplementary material TableS1, the data for kestrel are actually for sparrowhawk. The correct file is now available at <http://jeb.biologists.org/content/216/10/1819/suppl/DC1>. The authors apologise for any inconvenience that this error may have caused but assure readers that it does not affect the results or conclusions of the paper, or supplementary material Fig. S1.
